# Supplementary material
Source: PubMed Central journal article supplement (PMC2077273)

**A.**

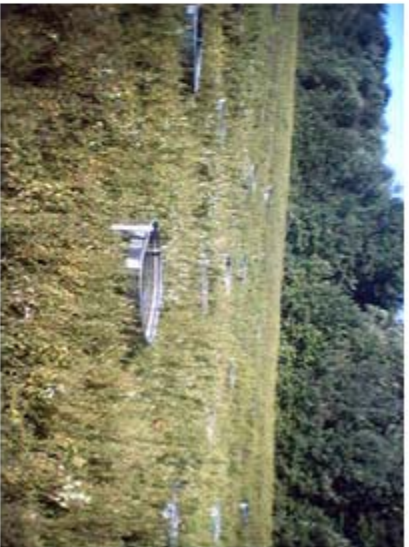

**B.**

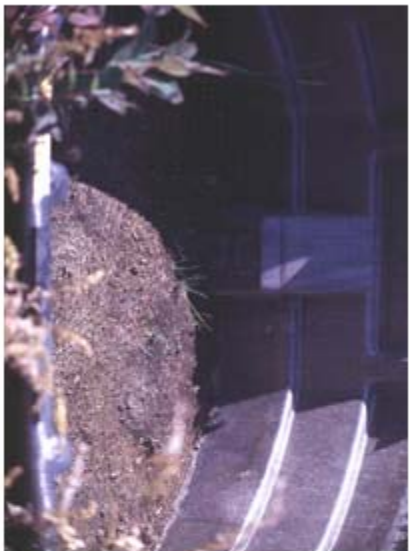

Supplement: pnas_0704350104_1.pdf [file pnas_0704350104_1.pdf]
